# Supplementary material
Source: PubMed Central journal article supplement (PMC2869039)
Supplement: NIHMS86554-supplement-1_si_001.pdf [file NIHMS86554-supplement-1_si_001.pdf]

## SUPPORTING INFORMATION

### Quantitative 3D Structure Linear Interaction Energy Model of 5'-O-[N-(Salicyl)sulfamoyl]adenosine and the Aryl Acid Adenylating Enzyme MbtA

Nicholas P. Labello,<sup>a</sup> Eric M. Bennett,<sup>a,c</sup> David M. Ferguson,<sup>a,b\*</sup> Courtney C. Aldrich<sup>a</sup>

<sup>a</sup>Center for Drug Design, Academic Health Center, University of Minnesota, Minneapolis, Minnesota 55455, Department of Medicinal Chemistry, <sup>b</sup>University of Minnesota, Minneapolis, Minnesota 55455, <sup>c</sup>Present Address: Wyeth Research, Pearl River, NY

10965

---

#### A. HPLC purity and conditions for compound S8.

**Table S1.** HPLC purity and methods

| Compound | Conditions | Retention time<br>(min) | Purity<br>(%) |
|----------|------------|-------------------------|---------------|
| S8       | Method 1   | 6.45                    | 98.0          |
|          | Method 2   | 5.52                    | 96.5          |

HPLC solvents:

A: 50 mM Triethylammonium bicarbonate

B: Methanol

HPLC column:

Analytical: Varian Microsorb MV100-5 C18, 250 × 4.6 mm, flowrate 0.5 mL/min

Methods:

Method 1: Isocratic elution with 30% B, 30 min, 220 nm detection

Method 2: Isocratic elution with 40% B, 30 min, 220 nm detection

## B. Synthesis of *N*<sup>6</sup>-Cyclopropyl-2-phenyl-Sal-AMS (**S8**).

### Scheme S1.

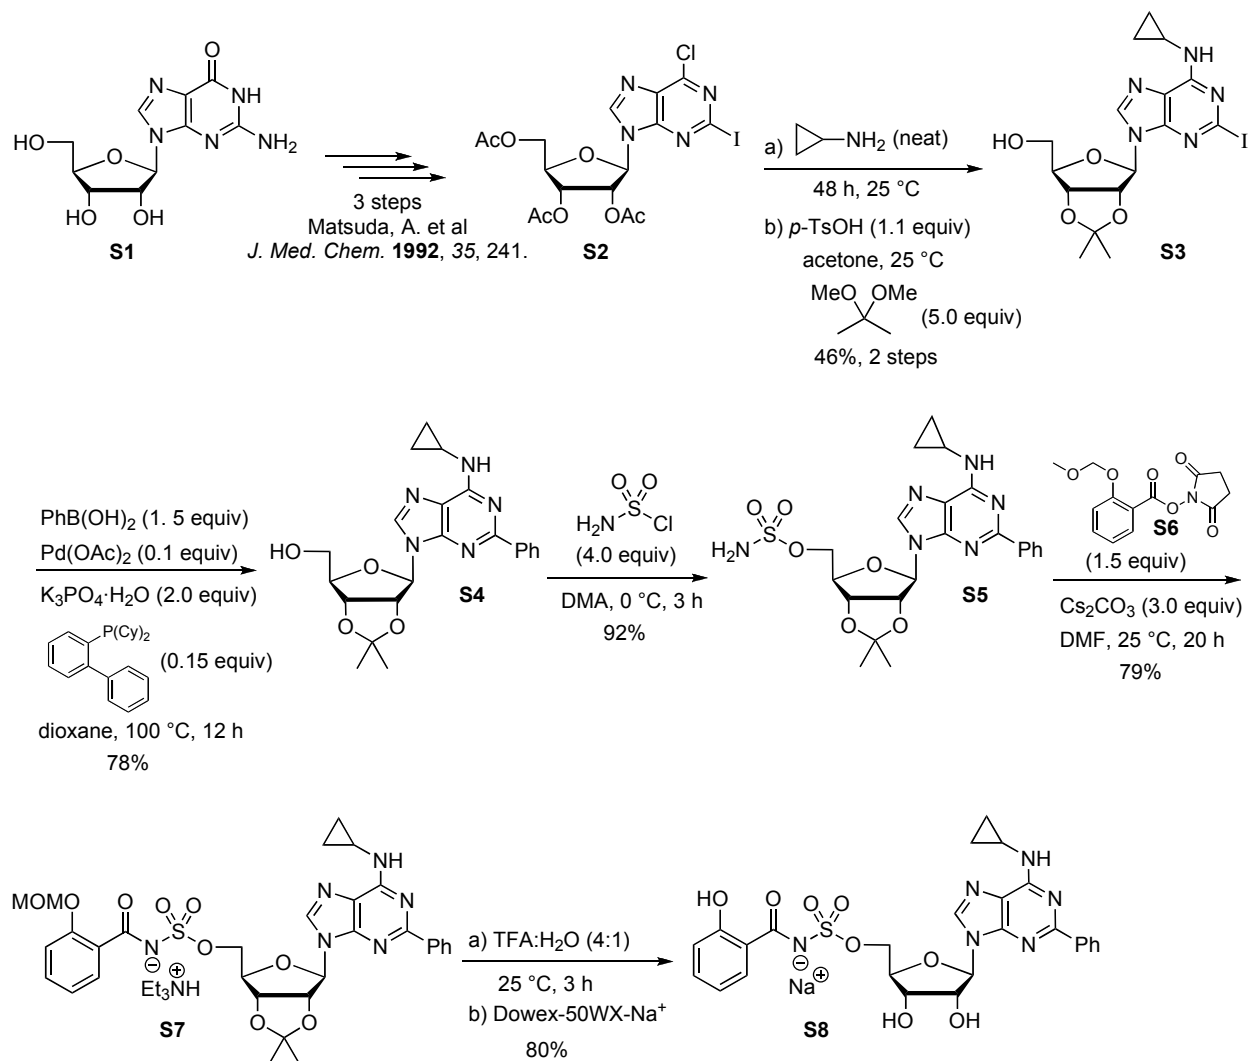

**Chemistry General Procedures.** All commercial reagents (Sigma-Aldrich, Acros, Strem) were used as provided unless otherwise indicated. Sulfamoyl chloride was prepared by the method of Heacock except that this was used directly without recrystallization.<sup>1</sup> *N*-Hydroxysuccinimidyl 2-(methoxymethoxy)benzoate **S6** was prepared as described.<sup>2</sup> Anhydrous DMF, DMA, and 1,4-dioxane were purchased from Aldrich. Flash chromatography was performed with an ISCO Combiflash Companion® purification system with the prepacked silica gel cartridges with the indicated solvent system. All reactions were performed under an inert atmosphere

of dry Ar or N<sub>2</sub> in oven-dried (150 °C) glassware. <sup>1</sup>H and <sup>13</sup>C NMR spectra were recorded on a Varian 600 MHz spectrometer. Proton chemical shifts are reported in ppm from an internal standard of residual chloroform (7.26 ppm) or methanol (3.31 ppm), and carbon chemical shifts are reported using an internal standard of residual chloroform (77.0 ppm) or methanol (49.1 ppm). Proton chemical data are reported as follows: chemical shift, multiplicity (s = singlet, d = doublet, t = triplet, q = quartet, p = pentet, m = multiplet, br = broad), coupling constant, integration. High resolution mass spectra were obtained on Agilent TOF/MS instrument equipped with either an ESI or APCI interface. Optical rotations were measured on Rudolph Autopol III polarimeter.

**N<sup>6</sup>-Cyclopropyl-2-iodo-2',3'-O-isopropylideneadenosine (S3).** Compound **S2**<sup>3</sup> (657 mg, 1.22 mmol) was stirred in neat cyclopropylamine (2.0 mL) for 48 h at 25 °C. The reaction was concentrated in vacuo and the residue taken up in acetone (10 mL) and re-concentrated by rotary evaporation. The viscous orange oil was dried under hi-vacuum overnight.

To a solution of the crude product prepared above in acetone (5 mL) were added dimethoxypropane (749 μL, 6.10 mmol, 5.0 equiv) and *p*-TsOH·H<sub>2</sub>O (255 mg, 1.34 mmol, 1.1 equiv). The reaction was stirred 24 h at 25 °C whereupon the product precipitated as the *p*-TsOH salt. Solid NaHCO<sub>3</sub> (537 mg, 6.1 mmol, 5.0 equiv) was added to the reaction and the heterogenous mixture stirred 20 min. The reaction was concentrated in vacuo and the residue partitioned between EtOAc (25 mL) and 1:1 H<sub>2</sub>O/saturated aqueous NaHCO<sub>3</sub>. The aqueous layer was further extracted with EtOAc (2 × 25 mL) and the combined organic extracts were washed with saturated aqueous NaCl (50 mL), dried (Na<sub>2</sub>SO<sub>4</sub>), and concentrated to a viscous orange oil. Flash chromatography (70:30 EtOAc/hexane) afforded the title compound (266 mg, 46%) as a colorless oil: *R*<sub>f</sub> = 0.50 (80:20 EtOAc/hexane); <sup>1</sup>H NMR (600 MHz, CD<sub>3</sub>OD) δ 8.10 (s, 1H), 6.03 (d, *J* = 3.0 Hz, 1H), 5.19 (dd, *J* = 6.0, 3.0 Hz, 1H), 4.96 (dd, *J* = 6.0, 2.4 Hz, 1H), 4.27–4.30 (m, 1H), 3.74 (dd, *J* = 12.0, 3.0 Hz, 1H), 3.68 (dd, *J* = 12.0, 4.8 Hz, 1H), 2.90–3.06 (br s, 1H), 1.55 (s, 3H), 1.33 (s, 3H), 0.80–0.83 (m, 2H), 0.57–0.60 (m, 2H); <sup>13</sup>C

NMR (150 MHz, CD<sub>3</sub>OD)  $\delta$  156.5 (br), 149.7 (br), 139.8, 119.8, 114.1, 91.3, 87.2, 84.1, 81.8, 62.4, 26.5, 24.5, 24.7 (br), 7.3 (br), missing 1 aryl carbon (C-2); MS (ESI+) calcd for C<sub>16</sub>H<sub>21</sub>IN<sub>5</sub>O<sub>4</sub> [M + H]<sup>+</sup> 474.1, found 474.1.

**N<sup>6</sup>-Cyclopropyl-2',3'-O-isopropylidene-2-phenyladenosine (S4).** To a solution of compound **S3** (182 mg, 0.38 mmol, 1.0 equiv) in 1,4-dioxane (5 mL) were added phenylboronic acid (70 mg, 0.58 mmol, 1.5 equiv), Pd(OAc)<sub>2</sub> (8.5 mg, 0.038 mmol, 0.10 equiv), 2-(biphenyl)dicyclohexylphosphine (20.1 mg, 0.0576 mmol, 0.15 equiv), and K<sub>3</sub>PO<sub>4</sub> (163 mg, 0.77 mmol, 2.0 equiv) and the reaction heated at 100 °C for 12 h. After cooling to rt, the mixture was diluted with EtOAc (50 mL), filtered thru a short pad of silica gel (1/3"), and concentrated onto Celite. Purification by flash chromatography (gradient from 60–100% EtOAc/hexane) afforded the title compound (128 mg, 78%) as a colorless oil: *R<sub>f</sub>* = 0.42 (80:20 EtOAc/hexane); <sup>1</sup>H NMR (600 MHz, CD<sub>3</sub>OD)  $\delta$  8.40 (d, *J* = 7.8 Hz, 2H), 8.16 (s, 1H), 7.39–7.43 (m, 3H), 6.21 (d, *J* = 3.0 Hz, 1H), 5.52 (dd, *J* = 6.0, 2.4 Hz, 1H), 5.13 (dd, *J* = 6.0, 3.0 Hz, 1H), 4.31–4.33 (m, 1H), 3.74 (dd, *J* = 12.0, 4.2 Hz, 1H), 3.68 (dd, *J* = 12.0, 4.8 Hz, 1H), 3.10 (br s, 1H), 1.62 (s, 3H), 1.39 (s, 3H), 0.86–0.89 (m, 2H), 0.63–0.65 (m, 2H); <sup>13</sup>C NMR (150 MHz, CD<sub>3</sub>OD)  $\delta$  160.7, 156.8, 141.5, 139.9, 130.8, 129.3, 129.1, 119.7, 115.2, 92.1, 88.6, 85.3, 83.1, 63.4, 27.6, 25.6, 24.7 (br), 7.5 (br) missing 1 aryl carbon (C-2); MS (ESI+) calcd for C<sub>22</sub>H<sub>26</sub>N<sub>5</sub>O<sub>4</sub> [M + H]<sup>+</sup> 424.2, found 474.2.

**N<sup>6</sup>-Cyclopropyl-2',3'-O-isopropylidene-2-phenyl-5'-O-(sulfamoyl)adenosine (S5).** Sulfamoyl chloride (114 mg, 0.99 mmol, 4.0 equiv) was added to a solution of **S4** (105 mg, 0.25 mmol, 1.0 equiv) in dimethylacetamide (2.0 mL) at 0 °C. The solution was stirred 4 h at 0 °C then partitioned between EtOAc (25 mL) and H<sub>2</sub>O (25 mL). The organic layer was separated, washed with H<sub>2</sub>O (3 × 25 mL), saturated aqueous NaCl (25 mL), dried (Na<sub>2</sub>SO<sub>4</sub>) and concentrated to afford the title compound (114 mg, 92%) as a white foam: *R<sub>f</sub>* = 0.20 (50:50 EtOAc/benzene); [ $\alpha$ ]<sub>D</sub><sup>23</sup> = +19.4 (*c* 0.853, MeOH); <sup>1</sup>H NMR (600 MHz, CD<sub>3</sub>OD)  $\delta$  8.43 (d, *J* = 7.2 Hz, 2H), 8.15 (s, 1H), 7.41–7.45 (m, 3H), 6.30 (d, *J* = 1.8 Hz, 1H), 5.57 (dd, *J* = 6.0, 1.8 Hz, 1H), 5.23 (dd, *J* = 6.0, 3.0 Hz, 1H), 4.52–4.56 (m, 1H), 4.33 (dd, *J* = 10.8, 4.8 Hz, 1H), 4.25 (dd, *J* = 10.8, 6.0 Hz, 1H), 3.14 (br s, 1H), 1.63 (s, 3H), 1.41 (s, 3H), 0.89–0.92 (m, 2H), 0.65–0.68 (m, 2H); <sup>13</sup>C NMR (150 MHz, CD<sub>3</sub>OD)  $\delta$  160.7,

156.9, 141.3, 139.8, 130.9, 129.3, 129.2, 119.6, 115.6, 91.8, 85.9, 85.5, 83.1, 81.8, 69.9, 27.5, 25.6, 24.7 (br), 7.5 (br) missing 1 aryl carbon (C-2); HRMS (APCI+) calcd for C<sub>22</sub>H<sub>27</sub>N<sub>6</sub>O<sub>6</sub>S [M + H]<sup>+</sup> 503.1707, found 503.1769 (error 12.3 ppm).

***N*<sup>6</sup>-Cyclopropyl-2',3'-*O*-isopropylidene-5'-*O*-{*N*-[2-(methoxymethoxy)benzoyl]sulfamoyl]-2-phenyladenosine Triethylammonium Salt (S7).** To a solution of **S5** (34 mg, 0.0677 mmol, 1.0 equiv) in DMF (3 mL) at 0 °C was added **S6** (28 mg, 0.10 mmol, 1.5 equiv) and Cs<sub>2</sub>CO<sub>3</sub> (46 mg, 0.20 mmol, 3.0 equiv) and the reaction stirred 21 h at 25 °C. The reaction was filtered and the filtrate concentrated by rotary evaporation (P ~5 mbar, water bath ~35 °C). Purification by flash chromatography (EtOAc–10% MeOH/EtOAc + 1% Et<sub>3</sub>N) afforded the title compound (40 mg, 79%) as a colorless oil: *R*<sub>f</sub> = 0.6 (96:4 EtOAc/MeOH); [α]<sub>D</sub><sup>23</sup> = –7.07 (*c* 1.98, MeOH); <sup>1</sup>H NMR (600 MHz, CD<sub>3</sub>OD) δ 8.47 (d, *J* = 7.2 Hz, 2H), 8.38 (s, 1H), 7.42–7.46 (m, 3H), 7.35 (dd, *J* = 7.2, 1.2 Hz, 1H), 7.25 (td, *J* = 7.8, 1.8 Hz, 1H), 7.09 (d, *J* = 8.4 Hz, 1H), 6.93 (t, *J* = 7.2 Hz, 1H), 6.36 (d, *J* = 3.0 Hz, 1H), 5.52 (dd, *J* = 6.0, 3.0 Hz, 1H), 5.29 (dd, *J* = 6.0, 1.8 Hz, 1H), 5.12 (s, 2H), 4.62–4.64 (m, 1H), 4.35–4.40 (m, 2H), 3.40 (s, 3H), 3.16 (br s, 1H), 3.10 (q, *J* = 7.2 Hz, 6H), 1.65 (s, 3H), 1.41 (s, 3H), 1.21 (t, *J* = 7.2 Hz, 9H), 0.90–0.93 (m, 2H), 0.66–0.69 (m, 2H); <sup>13</sup>C NMR (150 MHz, CD<sub>3</sub>OD) δ 176.7, 160.7, 156.9 (br), 155.6, 151.3 (br), 141.2, 139.9, 132.4, 131.0, 130.9, 129.7, 129.3, 129.2, 122.5, 119.4, 116.9, 115.3, 96.3, 91.7, 85.8, 85.7, 83.4, 70.0, 56.5, 47.8, 27.6, 25.7, 24.7 (br), 9.2, 7.5 (br); HRMS (ESI–) calcd for C<sub>31</sub>H<sub>33</sub>N<sub>6</sub>O<sub>9</sub>S [M – H]<sup>–</sup> 665.2035, found 665.2013 (error 3.3 ppm).

***N*<sup>6</sup>-Cyclopropyl-5'-*O*-[*N*-(2-hydroxybenzoyl)sulfamoyl]-2-phenyladenosine Sodium Salt (S8).** To a solution of **S7** (40 mg, 0.052 mmol, 1.0 equiv) in H<sub>2</sub>O (1 mL) was added trifluoroacetic acid (4 mL) and the reaction stirred 3 h at 25 °C. The reaction was concentrated in vacuo and placed under hi-vacuum for 16 h to remove traces of TFA. Purification by flash chromatography (EtOAc–20% MeOH/EtOAc + 1% Et<sub>3</sub>N) provided the title compound as the triethylammonium salt. Ion-exchange (Dowex-50WX-100 resin in the sodium form, 10 × 100 mm, elution with 50% aqueous methanol) afforded the title compound (25 mg, 80%) as a white solid:

$^1\text{H}$  NMR (600 MHz,  $\text{CD}_3\text{OD}$ )  $\delta$  8.46 (d,  $J = 6.6$  Hz, 2H), 8.42 (s, 1H), 7.93 (d,  $J = 7.8$  Hz, 1H), 7.39–7.44 (m, 3H), 7.28 (t,  $J = 7.2$  Hz, 1H), 6.78 (ovlp d,  $J = 8.4$  Hz, 1H), 6.76 (ovlp t,  $J = 7.8$  Hz, 1H), 6.23 (d,  $J = 6.0$  Hz, 1H), 4.82 (t,  $J = 4.8$  Hz, 1H), 4.49 (t,  $J = 4.2$  Hz, 1H), 4.46 (dd,  $J = 10.8, 5.4$  Hz, 1H), 4.38 (dd,  $J = 10.8, 3.0$  Hz, 1H), 4.33–4.36 (m, 1H), 3.15 (br s, 1H), 0.91–0.94 (m, 2H), 0.68 (s, 2H);  $^{13}\text{C}$  NMR (150 MHz,  $\text{CD}_3\text{OD}$ )  $\delta$  175.3, 162.1, 160.7, 156.8, 140.9, 140.0, 134.4, 131.4, 130.8, 129.4, 129.3, 129.1, 120.5, 119.5, 119.3, 117.9, 89.5, 84.2, 75.8, 72.3, 69.8, 24.6 (br), 7.6 (br); HRMS (ESI+) calcd for  $\text{C}_{26}\text{H}_{25}\text{N}_6\text{O}_8\text{S} [\text{M}]^-$  581.1460, found 581.1438 (error 3.8 ppm).

**C. Enzyme Kinetic Studies. ATP–PPi Exchange Assay to Determine  $K_1^{\text{app}}$  for S8.** The inhibition assays were performed as described in duplicate.<sup>4</sup> In brief the reaction was initiated by adding 10  $\mu\text{L}$  [ $^{32}\text{P}$ ]PP<sub>i</sub> (0.5  $\mu\text{Ci}$ ) to 7 nM MbtA in 90  $\mu\text{L}$  reaction buffer (278  $\mu\text{M}$  salicylic acid, 11.1 mM ATP, 1.11 mM PP<sub>i</sub>, 83.3 mM Tris-HCl, pH 7.5, 11.1 mM  $\text{MgCl}_2$ , 2.22 mM DTT) at 37 °C containing S8 (1.73–100 nM). The reaction was terminated by the addition of 200  $\mu\text{L}$  of quenching buffer (350 mM  $\text{HClO}_4$ , 100 mM PP<sub>i</sub>, 1.8 % *w/v* activated charcoal). The charcoal was pelleted by centrifugation and washed once with 500  $\mu\text{L}$   $\text{H}_2\text{O}$  and analyzed by liquid scintillation counting. The  $K_1^{\text{app}}$  value was calculated using the Morrison equation.<sup>5</sup>

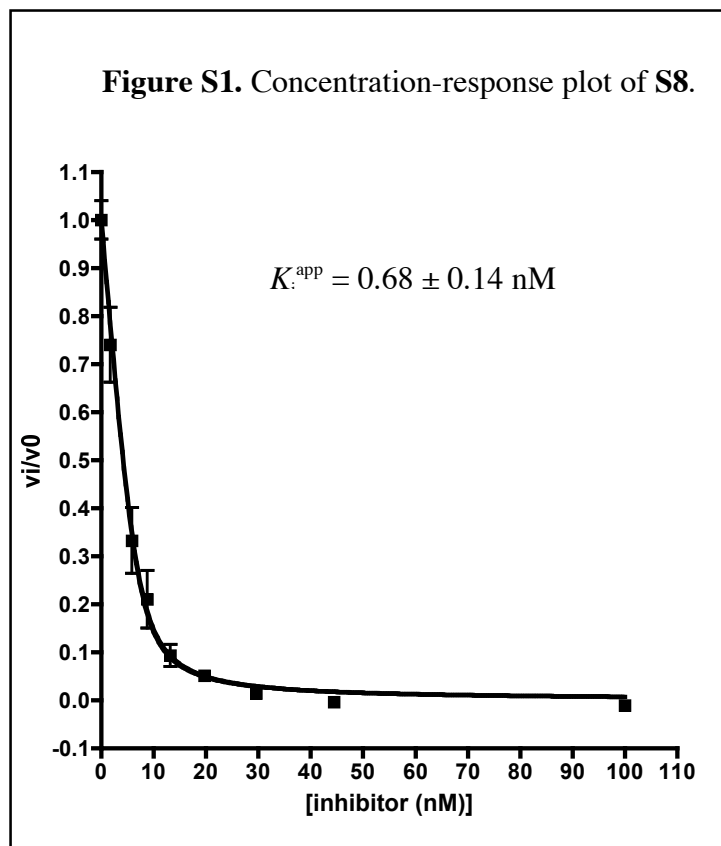

## D. References

- (1) Heacock, D., Forsyth, C. J., Shiba, K., and Musier-Forsyth, K. Synthesis and aminoacyl-tRNA synthetase inhibitory activity of prolyl adenylate analogs. *Bioorg. Chem.* **1996**, *24*, 273–289.
- (2) Qiao, C. H., Gupte, A., Boshoff, H. I., Wilson, D. J., Bennett, E. M., Somu, R. V., Barry, C. E., and Aldrich, C. C. 5'-O-[(N-Acyl)sulfamoyl]adenosines as antitubercular agents that inhibit MbtA: An adenylation enzyme required for siderophore biosynthesis of the mycobactins. *J. Med. Chem.* **2007**, *50*, 6080–6094.
- (3) Matsuda, A., Shinozaki, M., Yamaguchi, T., Homma, H., Nomoto, R., Miyasaka, T., Watanabe, Y., and Abiru, T. Nucleosides and nucleotides. 103. 2-Alkynyladenosines – A novel class of selective adenosine-A2 receptor agonists with potent antihypertensive effects. *J. Med. Chem.* **1992**, *35*, 241–252.
- (4) Somu, R. V., Wilson, D. J., Bennett, E. M., Boshoff, H. I., Celia, L., Beck, B. J., Barry, C. E., 3rd, and Aldrich, C. C. Antitubercular nucleosides that inhibit siderophore biosynthesis: SAR of the glycosyl domain. *J. Med. Chem.* **2006**, *49*, 7623–7635.
- (5) Copeland, R. A. *Evaluation of Enzyme Inhibitors in Drug Discovery*, Wiley, Hoboken, NJ, 2005; Chapter 7.
